# Supplementary material for: An active power control approach for wake-induced load alleviation in a fully developed wind farm boundary layer
Source: Copernicus journal article supplement (doi:10.5194/wes-2018-70), 2018-12-03
Supplement: Supplementary file [file wes-2018-70-AC1-supplement.pdf]

## Response to S. Boersma

We would like to thank Mr. Boersma for the positive comment regarding the relevance of our work. Mr. Boersma provides a list of additional references and suggests that they should be addressed in the submitted manuscript. We are grateful for the list.

We looked into the proposed references, and indicate here which ones we find relevant for our manuscript:

- 1) V. Spudic, et al. "Cooperative distributed model predictive control for wind farms", Optimal Control Applications and Methods, 2014.
- 4) T.N. Jensen, et al. "Fatigue minimising power reference control of a de-rated wind farm" Journal of Physics: Conference Series, 2016.
- 9) S. Boersma, et al. "A constrained wind farm controller providing secondary frequency regulation: an LES study", Renewable Energy, 2018.

The papers (#1) and (#4) address similar wind farm control problems with different approaches. The paper (#9) became available after the initial submission of our manuscript, and we will consider citing it in our revised manuscript.

We believe that the other suggested papers address aspects which are not extremely relevant to the main contributions of our manuscript:

- The paper (#6) does not include wake interactions in the development and validation of the control algorithm, while the papers (#2) and (#8) consider only laminar flows. On the other hand, our manuscript focuses on practical control solutions for more realistic flow and wake conditions.
- The papers (#3) and (#7) address de-rating strategies for load reduction at the wind turbine level, as opposed to our control concept for the wind farm level.
- The paper (#5) addresses APC requirements for grid connections, which is out of the scope of our submitted manuscript.
